# Supplementary material for: Effects of ovarian stimulation protocols on outcomes of assisted reproductive technology in adenomyosis women: a retrospective cohort study
Source: PubMed Central journal article supplement (PMC10472936; doi:10.3389/fendo.2023.1198779), 2023-08-17
Supplement: DataSheet_1.pdf [file DataSheet_1.pdf]

Supplementary Table I Multivariate logistic regression of clinical pregnancy in fresh ET cycles

|                                    | <i>B</i> | <i>SE</i> | <i>Wald</i> | <i>P</i> | <i>OR</i> | <i>95%CI</i> |
|------------------------------------|----------|-----------|-------------|----------|-----------|--------------|
| Age                                | -0.139   | 0.037     | 14.04       | <0.001   | 0.87      | 0.809-0.936  |
| BMI                                | -0.052   | 0.04      | 1.702       | 0.192    | 0.949     | 0.877-1.027  |
| Duration of infertility            | 0.016    | 0.049     | 0.1         | 0.752    | 1.016     | 0.922-1.119  |
| Primary infertility                | control  |           |             |          |           |              |
| Secondary infertility              | 0.452    | 0.349     | 1.672       | 0.196    | 1.571     | 0.792-3.115  |
| AFC                                | 0.071    | 0.033     | 4.737       | 0.030    | 1.073     | 1.007-1.144  |
| AMH                                | -0.145   | 0.091     | 2.56        | 0.110    | 0.865     | 0.724-1.033  |
| Basal FSH                          | 0.086    | 0.063     | 1.893       | 0.169    | 1.09      | 0.964-1.233  |
| initial uterine diameter           | 0.005    | 0.123     | 0.002       | 0.967    | 1.005     | 0.789-1.28   |
| None dysmenorrhea                  | control  |           |             |          |           |              |
| Mild dysmenorrhea                  | 0.113    | 0.387     | 0.086       | 0.769    | 1.12      | 0.525-2.391  |
| Moderate dysmenorrhea              | 0.206    | 0.436     | 0.223       | 0.637    | 1.229     | 0.523-2.888  |
| Severe dysmenorrhea                | 0.522    | 0.444     | 1.379       | 0.24     | 1.685     | 0.705-4.023  |
| COSGroup(ultra-long vs short)      | 0.661    | 0.402     | 2.698       | 0.1      | 1.937     | 0.88-4.261   |
| COSGroup(long vs short)            | 0.881    | 0.444     | 3.934       | 0.047    | 2.414     | 1.011-5.767  |
| COSGroup(antagonist vs short)      | 0.103    | 0.507     | 0.042       | 0.838    | 1.109     | 0.41-2.996   |
| COSGroup(ultra-long vs antagonist) | 0.557    | 0.464     | 1.443       | 0.230    | 1.746     | 0.703-4.336  |
| COSGroup(long vs antagonist)       | 0.778    | 0.494     | 2.481       | 0.115    | 2.177     | 0.827-5.730  |
| COSGroup(ultra-long vs long)       | -0.22    | 0.393     | 0.314       | 0.575    | 0.802     | 0.371-1.734  |

BMI: body mass index; AFC: antral follicle count; FSH: follicle stimulating hormone; AMH: anti-müllerian hormone; COS: controlled ovarian stimulation;

Supplementary Table II Multivariate logistic regression of live birth in fresh ET cycles

|                                    | <i>B</i> | <i>SE</i> | <i>Wald</i> | <i>P</i> | <i>OR</i> | <i>95%CI</i> |
|------------------------------------|----------|-----------|-------------|----------|-----------|--------------|
| Age                                | -0.211   | 0.044     | 23.354      | <0.001   | 0.809     | 0.743-0.882  |
| BMI                                | -0.077   | 0.043     | 3.185       | 0.074    | 0.926     | 0.85-1.008   |
| Duration of infertility            | 0.069    | 0.054     | 1.681       | 0.195    | 1.072     | 0.965-1.191  |
| Primary infertility                | control  |           |             |          |           |              |
| Secondary infertility              | 0.736    | 0.367     | 4.033       | 0.045    | 2.088     | 1.018-4.283  |
| AFC                                | 0.067    | 0.034     | 3.928       | 0.047    | 1.069     | 1.001-1.142  |
| AMH                                | -0.226   | 0.104     | 4.751       | 0.029    | 0.798     | 0.651-0.977  |
| Basal FSH                          | -0.005   | 0.071     | 0.005       | 0.945    | 0.995     | 0.866-1.143  |
| initial uterine diameter           | -0.049   | 0.135     | 0.132       | 0.716    | 0.952     | 0.731-1.24   |
| None dysmenorrhea                  | control  |           |             |          |           |              |
| Mild dysmenorrhea                  | -0.346   | 0.426     | 0.659       | 0.417    | 0.708     | 0.307-1.631  |
| Moderate dysmenorrhea              | -0.177   | 0.468     | 0.143       | 0.706    | 0.838     | 0.335-2.096  |
| Severe dysmenorrhea                | -0.093   | 0.468     | 0.04        | 0.842    | 0.911     | 0.364-2.28   |
| COSGroup(ultra-long vs short)      | 0.904    | 0.459     | 3.888       | 0.049    | 2.47      | 1.005-6.07   |
| COSGroup(long vs short)            | 1.024    | 0.495     | 4.28        | 0.039    | 2.786     | 1.055-7.353  |
| COSGroup(antagonist vs short)      | 0.253    | 0.597     | 0.18        | 0.672    | 1.288     | 0.4-4.148    |
| COSGroup(ultra-long vs antagonist) | 0.651    | 0.527     | 1.528       | 0.216    | 1.918     | 0.683-5.388  |
| COSGroup(long vs antagonist)       | 0.771    | 0.537     | 2.067       | 0.151    | 2.163     | 0.756-6.192  |
| COSGroup(ultra-long vs long)       | -0.12    | 0.397     | 0.092       | 0.762    | 0.887     | 0.407-1.931  |

BMI: body mass index; AFC: antral follicle count; FSH: follicle stimulating hormone; AMH: anti-müllerian hormone; COS: controlled ovarian stimulation;

Supplementary Table III Baseline characteristics of women  $\geq 35$  years with different COS protocols in fresh ET cycles

|                                     | Ultra-long protocol             | Long protocol                    | Antagonist protocol              | Short protocol                | P value |
|-------------------------------------|---------------------------------|----------------------------------|----------------------------------|-------------------------------|---------|
| No. of cycles                       | 48                              | 20                               | 15                               | 40                            |         |
| Age, years                          | 37.00(36.00,39.00) <sup>f</sup> | 38.00 (36.00,41.00)              | 42.00 (38.50,44.00) <sup>f</sup> | 39.00 (37.00,42.00)           | 0.002   |
| BMI, kg/m <sup>2</sup>              | 25.05 (22.29,27.81)             | 24.22 (20.53,27.91)              | 25.82(23.57,28.07)               | 24.94 (21.85,28.03)           | 0.474   |
| Duration of infertility, years      | 3.00 (1.08,5.50)                | 3.25 (2.00,5.00)                 | 3.00 (2.00,7.00) <sup>d</sup>    | 2.00 (1.00,3.00) <sup>d</sup> | 0.009   |
| Primary infertility, n(%)           | 9 (18.8) <sup>a</sup>           | 2(10.00)                         | 2(13.3)                          | 0 (0.00) <sup>a</sup>         | 0.003   |
| AFC                                 | 11.00(5.06, 7.83)               | 13.00 (10.00,16.00) <sup>e</sup> | 10.00 (6.00, 14.00) <sup>e</sup> | 9.00 (5.00,11.00)             | 0.019   |
| Basal FSH, IU/L                     | 6.10 (5.06,7.82)                | 6.52 (5.94,7.86)                 | 7.68 (6.55,9.90)                 | 7.09 (6.19,8.90)              | 0.050   |
| AMH, ng/ml                          | 1.54 (1.01,2.84)                | 1.76 (1.02,2.67)                 | 1.06 (0.55,3.18)                 | 1.33 (0.76,2.15)              | 0.285   |
| Mean diameter of initial uterus, cm | 6.70 (6.03,8.10)                | 5.35 (4.79,6.25)                 | 5.35 (4.79,6.25)                 | 5.62(4.76,6.27)               | 0.100   |
| History of dysmenorrhea             |                                 |                                  |                                  |                               | 0.010   |
| None, n(%)                          | 5 (10.40) <sup>a</sup>          | 7(35.00)                         | 5 (33.33)                        | 18(45.00) <sup>a</sup>        |         |
| Mild, n(%)                          | 13 (27.10)                      | 7(35.00)                         | 6 (40.00)                        | 12 (30.00)                    |         |
| Moderate, n(%)                      | 16 (33.30)                      | 3 (15.00)                        | 3 (20.00)                        | 5 (12.50)                     |         |
| Severe, n(%)                        | 14(29.20)                       | 3 (15.00)                        | 1 (6.70)                         | 5(12.50)                      |         |

Data were presented as median (25th-75th percentile) for non-normality distribution variables and frequencies (percentages) for categorical variables.

COS: controlled ovarian stimulation; BMI: body mass index; AFC: antral follicle count; FSH: follicle stimulating hormone; AMH: anti-müllerian hormone; ET embryo transfer

<sup>a</sup> ultra-long vs short; <sup>b</sup> long vs short; <sup>c</sup> ultra-long vs long; <sup>d</sup> antagonist vs short; <sup>e</sup> long vs antagonist; <sup>f</sup> ultra-long vs antagonist

Supplementary Table IV Outcomes of women  $\geq 35$  years with different protocols in fresh ET cycles

|                                                | Ultra-long protocol                      | Long protocol                          | Antagonist protocol            | Short protocol                         | P <sub>adjust</sub> |
|------------------------------------------------|------------------------------------------|----------------------------------------|--------------------------------|----------------------------------------|---------------------|
| No. of cycles                                  | 48                                       | 20                                     | 15                             | 40                                     |                     |
| Total dosage of Gn, IU                         | 2850.00 (2343.75, 4031.25) <sup>ac</sup> | 1800.00 (1387.50,2325.00) <sup>c</sup> | 2400.00 (1675.00,2950.00)      | 2025.00 (1575.00,2700.00) <sup>a</sup> | <0.001              |
| Duration of Gn stimulation, days               | 11.00 (9.25,12.75) <sup>acf</sup>        | 9.00 (8.25,10.00) <sup>c</sup>         | 9.00 (8.00,10.00) <sup>f</sup> | 9.00 (8.00,10.00) <sup>a</sup>         | <0.001              |
| LH on HCG trigger day, IU/L                    | 0.98 (0.51,1.66) <sup>acf</sup>          | 2.45 (1.97,3.34) <sup>bc</sup>         | 3.50 (2.10,6.29) <sup>df</sup> | 5.25 (3.60,7.30) <sup>abd</sup>        | <0.001              |
| E <sub>2</sub> on HCG trigger day, pg/ml       | 1836.50 (1186.00,2575.00)                | 2374.50 (1495.75, 2994.50)             | 1230.00 (958.00,1600.00)       | 1641.00 (1243.75,2483.00)              | 0.08                |
| P on HCG trigger day, ng/ml                    | 0.63 (0.40,0.83)                         | 0.52 (0.41,0.77)                       | 0.39 (0.34,0.54)               | 0.57 (0.34,0.75)                       | 0.317               |
| Endometrial thickness on HCG trigger day, cm   | 1.10 (0.90,1.20) <sup>a</sup>            | 1.00 (0.91,1.24) <sup>b</sup>          | 1.00 (0.80,1.10)               | 0.90 (0.80,1.08) <sup>ab</sup>         | 0.015               |
| No. of oocytes retrieved                       | 6.00 (4.00,11.75)                        | 8.00 (4.25,10.00)                      | 3.00 (2.00,6.00)               | 4.00 (3.00,8.00)                       | 0.011               |
| No. of 2PN zygotes retrieved                   | 4.50 (2.25,7.50) <sup>a</sup>            | 5.00 (3.00,8.75)                       | 3.00 (2.00,5.00)               | 2.00 (2.00,5.00) <sup>a</sup>          | 0.012               |
| No. of high-quality embryos retrieved on Day 3 | 2.00 (1.00,3.75)                         | 3.00 (2.00,4.75)                       | 2.00 (1.00,2.00)               | 1.00 (1.00,3.00)                       | 0.059               |
| Pregnancy outcomes, %(n/N)                     |                                          |                                        |                                |                                        |                     |
| IR                                             | 41.3 (31/75)                             | 36.4 (12/33)                           | 16.7 (4/24)                    | 37.5(12/32)                            | 0.183               |
| BPR                                            | 62.5(30/48)                              | 60.0 (12/20)                           | 33.3 (5/15)                    | 35.0 (14/40)                           | 0.87                |
| CPR                                            | 52.1 (25/48)                             | 50.0 (10/20)                           | 20.0(3/15)                     | 27.5 (11/40)                           | 0.031               |
| MR                                             | 48.0(12/25)                              | 40.0 (4/10)                            | 66.7 (2/3)                     | 63.6 (7/11)                            | 0.417               |
| Early MR                                       | 28.0 (7/25)                              | 30.0 (3/10)                            | 66.7(2/3)                      | 54.5 (6/11)                            | 0.288               |
| Late MR                                        | 20.0(5/25)                               | 10.0 (1/10)                            | 0.00(0/3)                      | 9.1 (1/11)                             | 0.846               |
| LBR                                            | 27.1 (13/48)                             | 30.0 (6/20)                            | 6.7% (1/15)                    | 10.0 (4/40)                            | 0.071               |

Data were presented as median (25th-75th percentile) for non-normality distribution variables. Gn: gonadotropin; LH: luteinizing hormone; E<sub>2</sub>: estradiol; P: progesterone; HCG: human chorionic gonadotropin IR: implantation rate; BPR: biochemical pregnancy rate; EPR: ectopic pregnancy rate; CPR: clinical pregnancy rate; MR: miscarriage rate; LBR: live birth rate

<sup>a</sup>ultra-long vs short; <sup>b</sup>long vs short; <sup>c</sup>ultra-long vs long; <sup>d</sup>antagonist vs short; <sup>e</sup>long vs antagonist; <sup>f</sup>ultra-long vs antagonist <sup>g</sup>Fisher's exact test

**Supplementary Table V** Baseline characteristics of women  $\geq 35$  years receiving FET with frozen embryo originating COS cycles

|                                        | Ultra-long protocol              | Long protocol                     | Antagonist protocol              | Short protocol                   | P      |
|----------------------------------------|----------------------------------|-----------------------------------|----------------------------------|----------------------------------|--------|
| No. of cycles                          | 46                               | 36                                | 20                               | 37                               |        |
| Age, years                             | 37.00 (36.00,40.00)              | 37.00 (35.00,41.00)               | 38.00 (35.25,40.75)              | 38.00 (36.00,41.00)              | 0.331  |
| BMI, kg/m <sup>2</sup>                 | 23.85 (22.69,27.21) <sup>c</sup> | 22.14(20.73,24.67) <sup>bce</sup> | 25.28 (23.81,26.07) <sup>e</sup> | 25.33 (23.36,26.75) <sup>b</sup> | 0.001  |
| Duration of infertility, years         | 3.25 (1.38,7.00) <sup>ac</sup>   | 2.00 (1.00,4.00) <sup>ce</sup>    | 3.25 (2.00,7.38) <sup>e</sup>    | 2.50 (1.50,3.00) <sup>a</sup>    | 0.038  |
| Primary infertility, n(%)              | 14 (30.4) <sup>a</sup>           | 6 (16.7) <sup>b</sup>             | 4 (20.0) <sup>d</sup>            | 2 (5.4) <sup>abd</sup>           | 0.028  |
| AFC                                    | 12.00 (9.00,15.25)               | 13.50 (10.00,18.75) <sup>b</sup>  | 10.50 (8.25,14.0)                | 11.00 (6.00,12.00) <sup>b</sup>  | 0.004  |
| Basal FSH, IU/L                        | 5.98 (5.11,7.25) <sup>af</sup>   | 6.07 (5.11,7.07) <sup>be</sup>    | 6.72 (5.74,9.73) <sup>ef</sup>   | 6.92 (5.57,7.73) <sup>ab</sup>   | 0.029  |
| AMH, ng/ml                             | 2.16 (1.46,4.69) <sup>a</sup>    | 2.78 (1.53,4.37) <sup>b</sup>     | 2.00 (1.10,6.00) <sup>d</sup>    | 1.36 (0.86,2.17) <sup>abd</sup>  | 0.002  |
| Mean diameter of initial uterus, cm    | 7.00 (6.15,7.76) <sup>ac</sup>   | 5.75 (4.80,6.70) <sup>c</sup>     | 6.50 (5.09,8.48)                 | 5.85 (4.98,6.48) <sup>a</sup>    | <0.001 |
| History of dysmenorrhea                |                                  |                                   |                                  |                                  | 0.03   |
| None, n(%)                             | 9 (19.6) <sup>f</sup>            | 10 (27.8)                         | 0 (0.00) <sup>df</sup>           | 12 (32.4) <sup>d</sup>           |        |
| Mild, n(%)                             | 13 (28.3)                        | 15(41.7)                          | 8 (40.0)                         | 14 (37.8)                        |        |
| Moderate, n(%)                         | 10 (21.7) <sup>f</sup>           | 5 (13.9) <sup>b</sup>             | 11 (55.0) <sup>fd</sup>          | 6 (16.2) <sup>bd</sup>           |        |
| Severe, n(%)                           | 14 (30.4)                        | 6 (16.7)                          | 1 (5.0)                          | 5 (13.5)                         |        |
| long acting GnRHa pretreatments before |                                  |                                   |                                  |                                  | 0.009  |
| yes                                    | 14(30.4%) <sup>c</sup>           | 23(63.9%) <sup>ce</sup>           | 6(30.00%) <sup>de</sup>          | 19(51.4%) <sup>d</sup>           |        |
| no                                     | 32(69.6%) <sup>c</sup>           | 13(36.1%) <sup>c</sup>            | 14(70.00%)                       | 18(48.6%)                        |        |

Data were presented as median (25th-75th percentile) for non-normality distribution variables and frequencies (percentages) for categorical variables.

BMI: body mass index; AFC: antral follicle count; FSH: follicle stimulating hormone; AMH: anti-müllerian hormone; COS: controlled ovarian stimulation; FET: frozen embryo transplant

<sup>a</sup> ultra-long vs short; <sup>b</sup> long vs short; <sup>c</sup> ultra-long vs long; <sup>d</sup> antagonist vs short; <sup>e</sup> long vs antagonist; <sup>f</sup> ultra-long vs antagonist

**Supplementary Table VI** Pregnancy outcomes and COS characteristics of women  $\geq 35$  years receiving FET with frozen embryo originating COS cycles

|                                                | Ultra-long protocol                     | Long protocol                          | Antagonist protocol            | Short protocol                         | P <sub>adjust</sub> |
|------------------------------------------------|-----------------------------------------|----------------------------------------|--------------------------------|----------------------------------------|---------------------|
| No. of cycles                                  | 46                                      | 36                                     | 20                             | 37                                     |                     |
| Total dosage of Gn, IU                         | 2512.50 (2081.25,3637.50) <sup>ac</sup> | 1987.50 (1350.00,2475.00) <sup>c</sup> | 2437.50 (1625.00,3043.75)      | 2025.00 (1612.50,2625.00) <sup>a</sup> | 0.005               |
| Duration of Gn stimulation, days               | 11.00 (10.00,12.25) <sup>acf</sup>      | 10.00 (9.00,11.75) <sup>c</sup>        | 9.00 (9.00,10.75) <sup>f</sup> | 9.00 (8.00,10.50) <sup>a</sup>         | <0.001              |
| LH on HCG trigger day, IU/L                    | 0.97 (0.62,1.28) <sup>acf</sup>         | 1.93 (1.31,2.36) <sup>bc</sup>         | 3.47 (1.84,4.90) <sup>f</sup>  | 5.25 (3.64,6.71) <sup>ab</sup>         | <0.001              |
| E <sub>2</sub> on HCG trigger day, pg/ml       | 3000.00 (2135.50,4000.00)               | 2756.00 (2003.00,3746.00)              | 1957.50 (1142.00,3358.00)      | 1816.00 (1587.00,3167.50)              | 0.069               |
| P on HCG trigger day, ng/ml                    | 0.65 (0.46,0.93)                        | 0.65 (0.46,0.83)                       | 0.44 (0.27,1.19)               | 0.73 (0.43,0.91)                       | 0.900               |
| Endometrial thickness on HCG trigger day, cm   | 0.93 (0.75,1.00)                        | 0.90 (0.81,1.08)                       | 0.90 (0.80,1.08)               | 0.85 (0.73,1.00)                       | 0.623               |
| No. of oocytes retrieved                       | 11.50 (9.00,15.25) <sup>af</sup>        | 10.00 (7.5,15.75) <sup>b</sup>         | 6.00 (4.00,14.00) <sup>f</sup> | 5.00 (4.00,9.00) <sup>ab</sup>         | <0.001              |
| No. of 2PN zygotes retrieved                   | 7.00 (5.00,12.00) <sup>a</sup>          | 8.00 (5.00,9.00) <sup>b</sup>          | 4.00 (3.00,9.50)               | 4.00 (3.00,6.50) <sup>ab</sup>         | <0.001              |
| No. of high-quality embryos retrieved on Day 3 | 3.00 (2.00,6.25)                        | 4.00 (2.00,5.00)                       | 2.5 (1.00,4.00)                | 3.00 (2.00,4.00)                       | 0.104               |
| Pregnancy outcomes, %(n/N)                     |                                         |                                        |                                |                                        |                     |
| IR                                             | 32.6 (15/46)                            | 61.1 (22/36)                           | 25.0 (5/20)                    | 48.6 (18/37)                           | 0.020               |
| BPR                                            | 47.8(22/46)                             | 63.9 (23/38)                           | 30.0 (6/20)                    | 56.7(21/37)                            | 0.338               |
| CPR                                            | 30.4 (14/46)                            | 58.3 (21/36)                           | 25.0(5/20)                     | 48.6 (18/37)                           | 0.024               |
| MR                                             | 35.7 (5/14)                             | 23.8(5/21)                             | 40.0(2/5)                      | 44.4(8/18)                             | 0.634               |
| Early MR                                       | 28.6 (4/14)                             | 23.8 (5/21)                            | 40.0 (2/5)                     | 38.9 (7/18)                            | 0.732               |
| Late MR                                        | 7.1 (1/14)                              | -                                      | -                              | 5.6 (1/18)                             | 0.599               |
| LBR                                            | 19.6 (9/46)                             | 42.9 (15/35)                           | 15.0 (3/20)                    | 27.0 (10/37)                           | 0.078               |
| <b>CLBR</b>                                    | <b>34.4(22/64)<sup>c</sup></b>          | <b>68.8(22/32)<sup>bce</sup></b>       | <b>16(4/25)<sup>e</sup></b>    | <b>26.4(14/53)<sup>b</sup></b>         | <b>0.001</b>        |
| <b>CLBR<sup>hypo</sup></b>                     | <b>51.2(44/86)<sup>c</sup></b>          | <b>77.3(34/44)<sup>bce</sup></b>       | <b>34.4(11/32)<sup>e</sup></b> | <b>42.6(29/68)<sup>b</sup></b>         | <b>0.001</b>        |

Data were presented as median (25th-75th percentile) for non-normality distribution variables. Gn: gonadotropin; LH: luteinizing hormone; E<sub>2</sub>: estradiol; P: progesterone; HCG: human chorionic gonadotropin IR: implantation rate; BPR: biochemical pregnancy rate; EPR: ectopic pregnancy rate; CPR: clinical pregnancy rate; MR: miscarriage rate; LBR: live birth rate **CLBR: cumulative live birth rate, was calculated basing on current finished embryo transfer cycles. CLBR<sup>hypo</sup> was calculated by hypothesizing that all surplus embryos were transferred and live birth was achieved.** <sup>a</sup>ultra-long vs short; <sup>b</sup>long vs short; <sup>c</sup>ultra-long vs long; <sup>d</sup>antagonist vs short; <sup>e</sup>long vs antagonist; <sup>f</sup>ultra-long vs antagonist <sup>g</sup>Fisher's exact test.

**Supplementary Table VII** Multivariate logistic regression of clinical pregnancy among women  $\geq 35$  years in fresh ET cycles

|                                    | <i>B</i> | <i>SE</i> | <i>Wald</i> | <i>P</i> | <i>OR</i> | <i>95%CI</i> |
|------------------------------------|----------|-----------|-------------|----------|-----------|--------------|
| Age                                | -0.240   | 0.091     | 6.932       | 0.008    | 0.787     | 0.658-0.941  |
| BMI                                | 0.044    | 0.075     | 0.350       | 0.554    | 1.045     | 0.903-1.210  |
| Duration of infertility            | -0.029   | 0.088     | 0.109       | 0.741    | 0.971     | 0.817-1.154  |
| Primary infertility                | control  |           |             |          |           |              |
| Secondary infertility              | -0.930   | 0.817     | 1.297       | 0.255    | 0.394     | 0.080-1.955  |
| AFC                                | -0.029   | 0.056     | 0.266       | 0.606    | 0.971     | 0.870-1.085  |
| AMH                                | 0.044    | 0.157     | 0.077       | 0.782    | 1.045     | 0.767-1.422  |
| Basal FSH                          | 0.171    | 0.090     | 3.591       | 0.058    | 1.186     | 0.994-1.415  |
| initial uterine diameter           | 0.010    | 0.197     | 0.002       | 0.962    | 1.010     | 0.686-1.486  |
| None dysmenorrhea                  | control  |           |             |          |           |              |
| Mild dysmenorrhea                  | -1.058   | 0.708     | 2.234       | 0.135    | 0.347     | 0.087-1.390  |
| Moderate dysmenorrhea              | -0.100   | 0.636     | 2.469       | 0.116    | 0.368     | 0.106-1.280  |
| Severe dysmenorrhea                | -1.079   | 0.644     | 2.805       | 0.094    | 0.340     | 0.096-1.202  |
| COSGroup(short vs ultra-long)      | 0.045    | 0.838     | 0.003       | 0.957    | 1.046     | 0.202-5.402  |
| COSGroup(short vs long)            | -0.297   | 0.941     | 0.100       | 0.752    | 0.743     | 0.118-4.693  |
| COSGroup(short vs antagonist)      | 0.288    | 1.052     | 0.075       | 0.785    | 1.333     | 0.17-10.480  |
| COSGroup(antagonist vs ultra-long) | 1.262    | 0.675     | 3.491       | 0.062    | 3.532     | 0.94-13.271  |
| COSGroup(antagonist vs long)       | 1.044    | 0.723     | 2.083       | 0.149    | 2.841     | 0.69-11.726  |
| COSGroup(long vs ultra-long)       | 1.070    | 0.612     | 3.053       | 0.081    | 2.915     | 0.878-9.683  |

BMI: body mass index; AFC: antral follicle count; FSH: follicle stimulating hormone; AMH: anti-müllerian hormone; COS: controlled ovarian stimulation;

**Supplementary Table VIII** Multivariate logistic regression of clinical pregnancy among women  $\geq 35$  years in FET cycles

|                          | <i>B</i> | <i>SE</i> | <i>Wald</i> | <i>P</i> | <i>OR</i> | <i>95%CI</i> |
|--------------------------|----------|-----------|-------------|----------|-----------|--------------|
| Age                      | 0.015    | 0.072     | 0.044       | 0.834    | 1.015     | 0.882-1.168  |
| BMI                      | -0.115   | 0.068     | 2.854       | 0.091    | 0.892     | 0.781-1.019  |
| Duration of infertility  | 0.021    | 0.072     | 0.082       | 0.774    | 1.021     | 0.887-1.174  |
| Primary infertility      | control  |           |             |          |           |              |
| Secondary infertility    | -1.610   | 0.632     | 6.490       | 0.011    | 0.200     | 0.058-0.690  |
| AFC                      | -0.101   | 0.049     | 4.341       | 0.037    | 0.903     | 0.821-0.994  |
| AMH                      | 0.099    | 0.110     | 0.811       | 0.368    | 1.104     | 0.890-1.371  |
| Basal FSH                | -0.069   | 0.094     | 0.543       | 0.461    | 0.933     | 0.777-1.121  |
| initial uterine diameter | -0.192   | 0.160     | 1.434       | 0.231    | 0.825     | 0.602-1.130  |
| None dysmenorrhea        | control  |           |             |          |           |              |
| Mild dysmenorrhea        | -0.820   | 0.622     | 1.739       | 0.187    | 0.441     | 0.130-1.490  |
| Moderate dysmenorrhea    | -0.330   | 0.556     | 0.353       | 0.552    | 0.719     | 0.242-2.136  |
| Severe dysmenorrhea      | -0.823   | 0.611     | 1.813       | 0.178    | 0.439     | 0.132-1.455  |
| No GnRHa pretreatment    | control  |           |             |          |           |              |
| GnRHa pretreatment       | -0.365   | 0.395     | 0.856       | 0.355    | 0.694     | 0.320-1.505  |

BMI: body mass index; AFC: antral follicle count; FSH: follicle stimulating hormone; AMH: anti-müllerian hormone; GnRHa: gonadotropin agonist
